# Supplementary material for: Oxalate capped iron nanomaterial: from methylene blue degradation to bis(indolyl)methane synthesis
Source: Royal Society of Chemistry journal article supplement (doi:10.1039/c4ra04214j), 2014-01-01
Supplement: c4ra04214j1.pdf [file c4ra04214j1.pdf]

# **Oxalate capped Iron Nano: From Methylene blue degradation to Bis(indolyl)methane synthesis**

Rupa Pegu, Krishna Joyti Majumdar, Dhruva Joyti Talukdar, and Sanjay Pratihari\*

[spratihari@tezu.ernet.in](mailto:spratihari@tezu.ernet.in), [spratihari29@gmail.com](mailto:spratihari29@gmail.com)

*\*Department of Chemical Sciences, Tezpur University, Napaam, 784028, Assam, India*

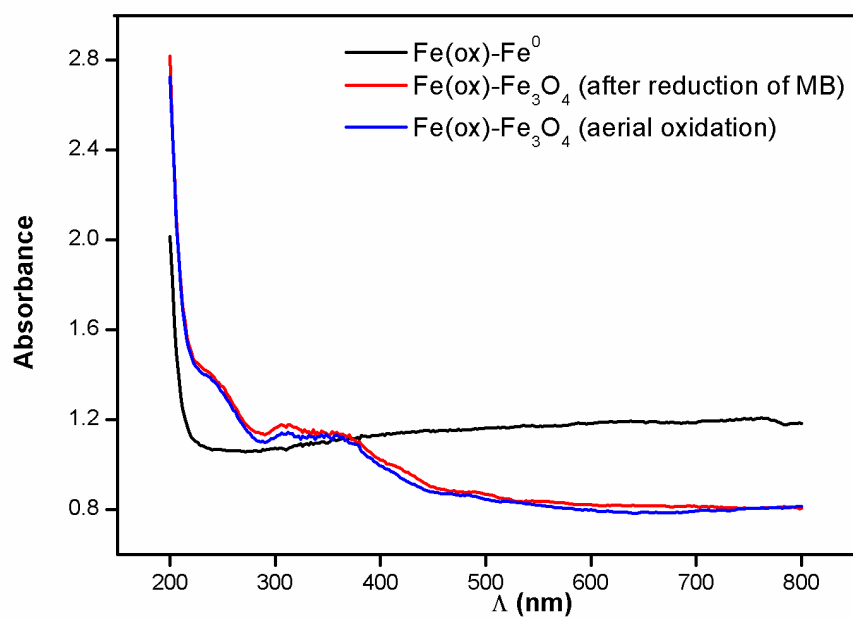

**Fig. S1.** UV-vis spectrum of Fe(ox)-Fe<sup>0</sup>, before and after the oxidation.

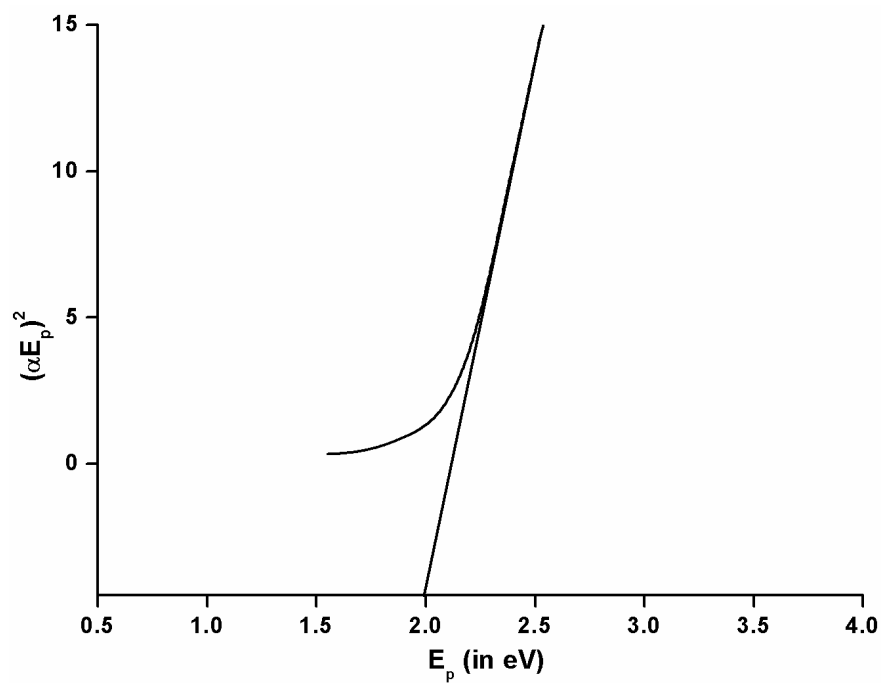

**Fig. S2.** Band gap value of Fe(ox)-Fe<sub>3</sub>O<sub>4</sub>.

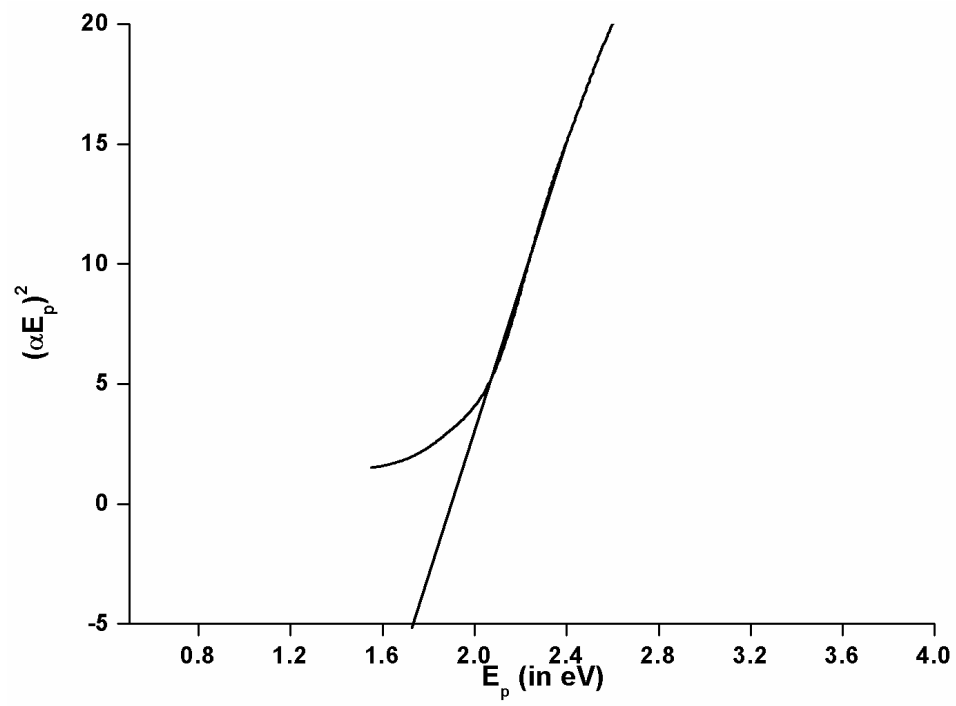

**Fig. S3.** Band gap value of  $\text{Fe}_3\text{O}_4$ .

## Synthesis of Iron Nano [Fe(ox)-Fe<sup>0</sup>]. . .

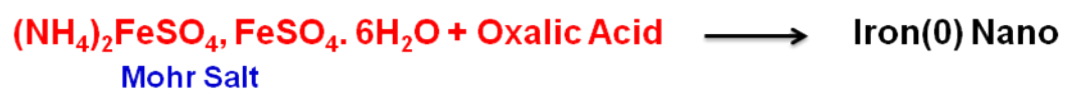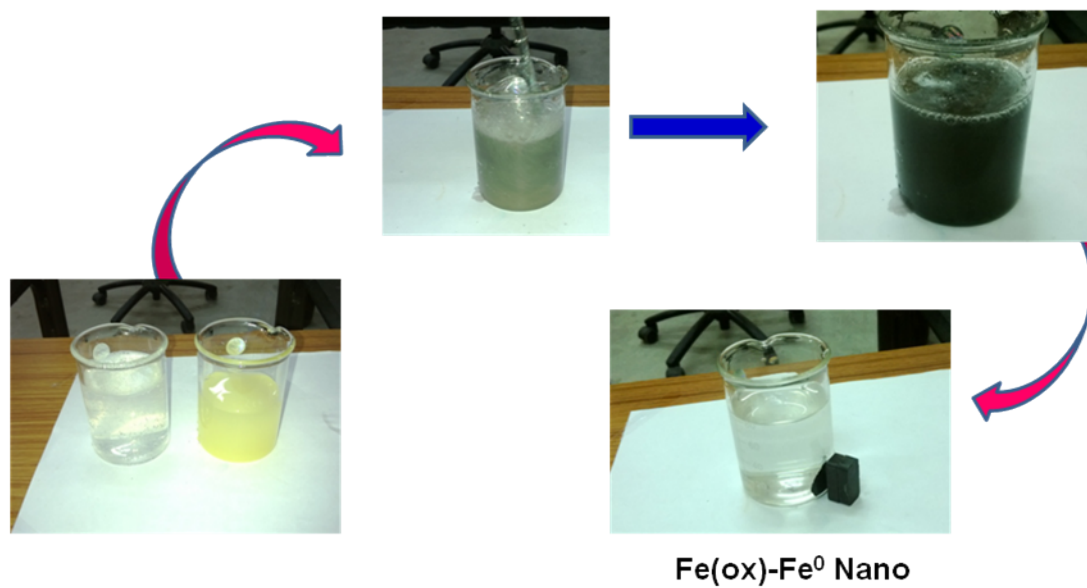

**Fig. S4.** Synthetic procedure of Fe(ox)-Fe<sup>0</sup>.

## Characterization of Oxidized product (Reddish-Brown Material) . . .

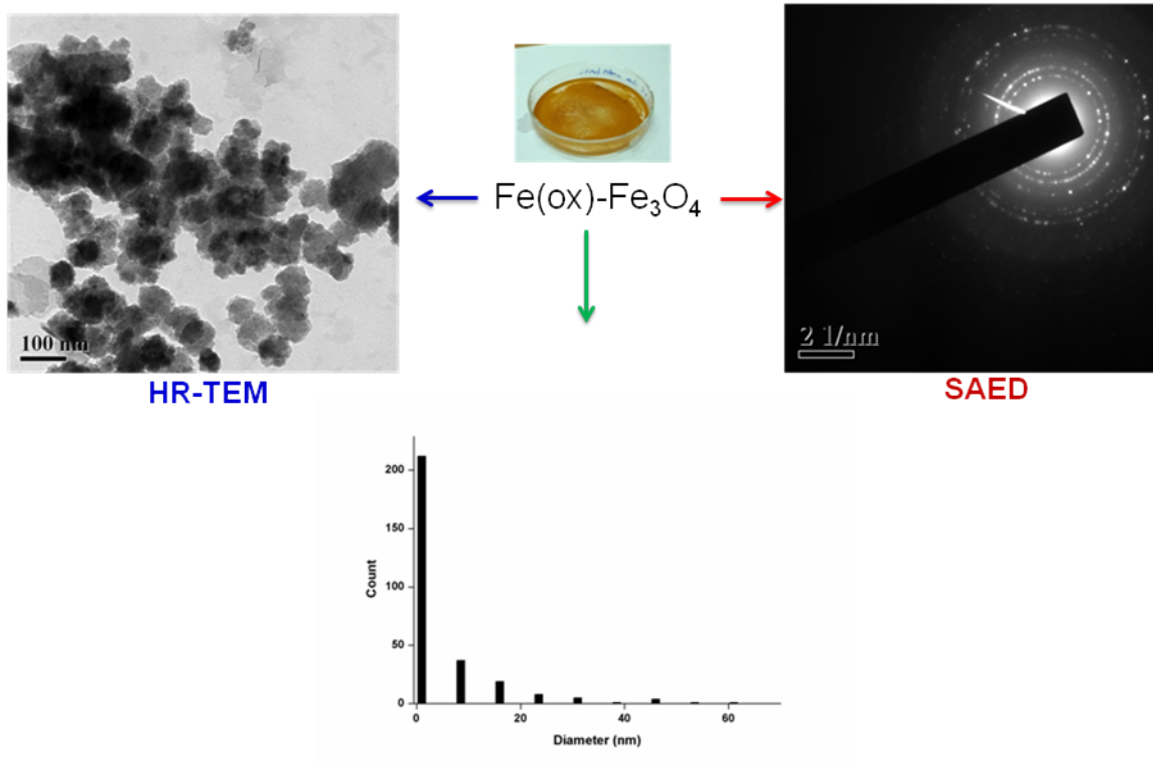

**Fig. S5.** TEM, particle distribution, and SAED pattern of Fe<sub>3</sub>O<sub>4</sub>.

## TEM and Particle Distribution of Iron Nano [Fe(ox)-Fe<sup>0</sup>]. . .

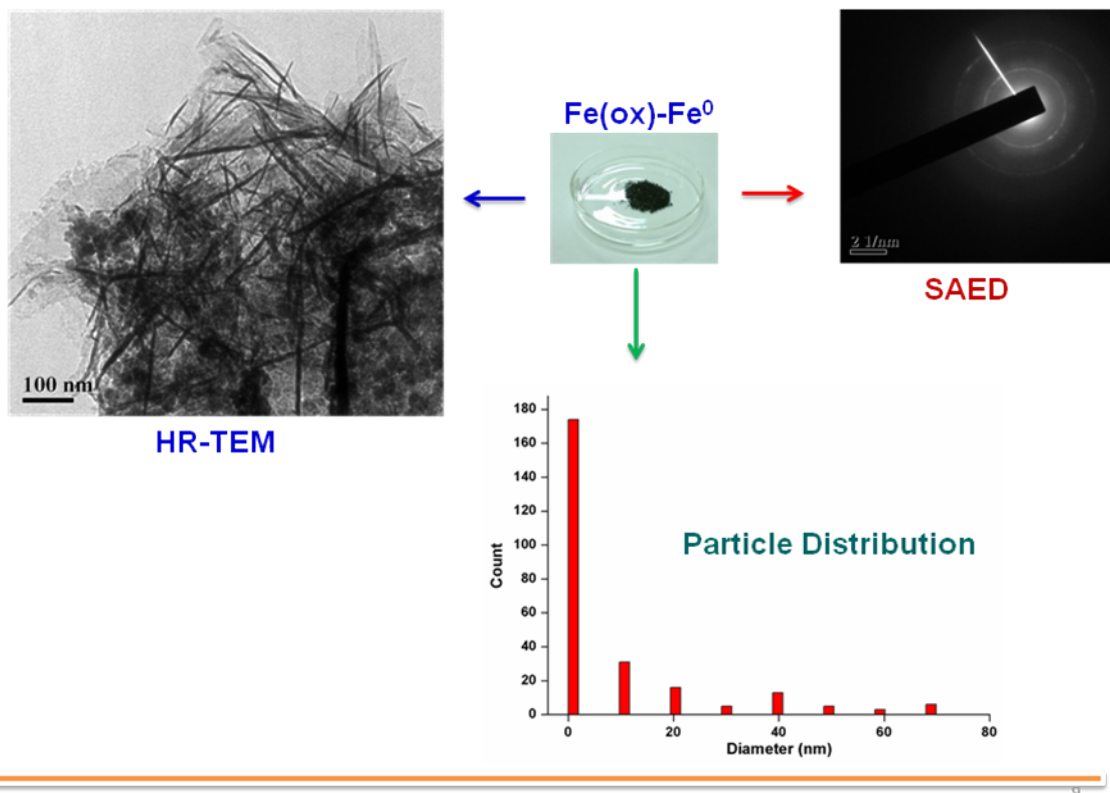

**Fig. S6.** TEM, particle distribution, and SAED pattern of Fe(ox)-Fe<sup>0</sup>.

**Table S1** condensation reaction between aldehyde and indoles in water
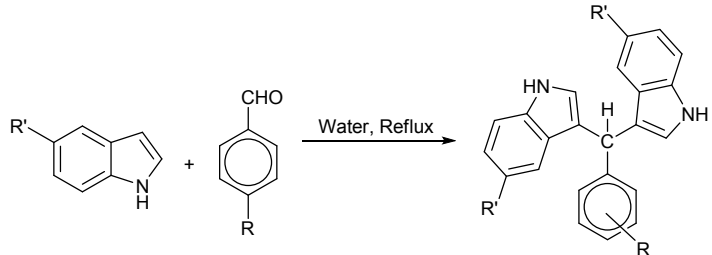

| #  | R               | R'  | Product   | Time (h) | Yield (%) |
|----|-----------------|-----|-----------|----------|-----------|
| 3  | Br              | H   | <b>1c</b> | 6        | 21        |
| 4  | Me              | H   | <b>1b</b> | 6        | 8         |
| 7  | NO <sub>2</sub> | Br  | <b>1g</b> | 6        | 12        |
| 8  | Me              | OMe | <b>1h</b> | 6        | 10        |
| 10 | H               | OMe | <b>1j</b> | 6        | <5        |

***Involvement of Fe(ox)-Fe<sub>3</sub>O<sub>4</sub> as a catalyst in the condensation reaction between aldehydes and indoles:***

There are several different possible modes of coordination of carbonyl group to metal catalysts. Mainly four types of coordination modes of aldehyde have been proposed (scheme 1).<sup>1</sup>

**Scheme 1.** Possible coordination mode of aldehyde with metal catalyst

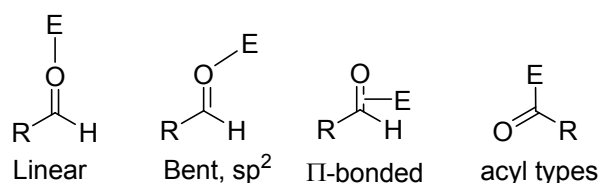

It is expected that after binding of C=O to metal catalyst, there must be a shift in both the C=O and C-H stretching band of aldehyde as compared to free aldehyde. The material was prepared for the study by grinding the 1:1 mixture of aldehyde and catalyst in a motor pestle for 0.5 h. The two material; Fe<sub>3</sub>O<sub>4</sub> and Fe(ox)-Fe<sub>3</sub>O<sub>4</sub> was chosen for the study. The FTIR spectra of free 4-bromo benzaldehyde (**2a**) shows two peaks at 2763 and 2855 cm<sup>-1</sup> due to C-H stretching vibration and another two peaks at 1693 and 1577 cm<sup>-1</sup> due the C=O stretching vibration of **2a**. In the mixture of **2a** and Fe(ox)-Fe<sub>3</sub>O<sub>4</sub>, the C-H stretching vibration at 2763 cm<sup>-1</sup> of **2a** shifted to lower wavenumber, which indicates the binding of **2a** with Fe(ox)-Fe<sub>3</sub>O<sub>4</sub> catalyst (Fig. S7). On the other hand the C=O stretching vibration at 1693 for free **2a** also shifted to lower wavenumber in the mixture of **2a** and Fe(ox)-Fe<sub>3</sub>O<sub>4</sub> sample (Fig. S8), which also suggested the interaction of

**2a** with Fe(ox)-Fe<sub>3</sub>O<sub>4</sub>. In case of Fe<sub>3</sub>O<sub>4</sub> material, less shift of C=O and C-H stretching vibration was observed as compared to Fe(ox)-Fe<sub>3</sub>O<sub>4</sub>.

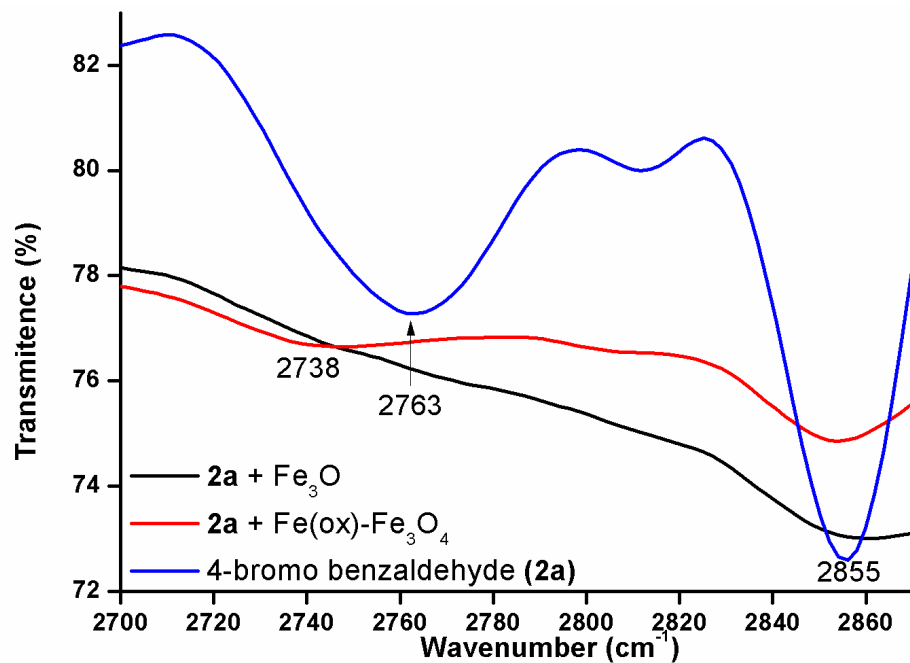

**Fig. S7.** FTIR spectra of 4-bromo benzaldehyde (C-H stretching band) on Fe<sub>3</sub>O<sub>4</sub> and Fe(ox)-Fe<sub>3</sub>O<sub>4</sub>.



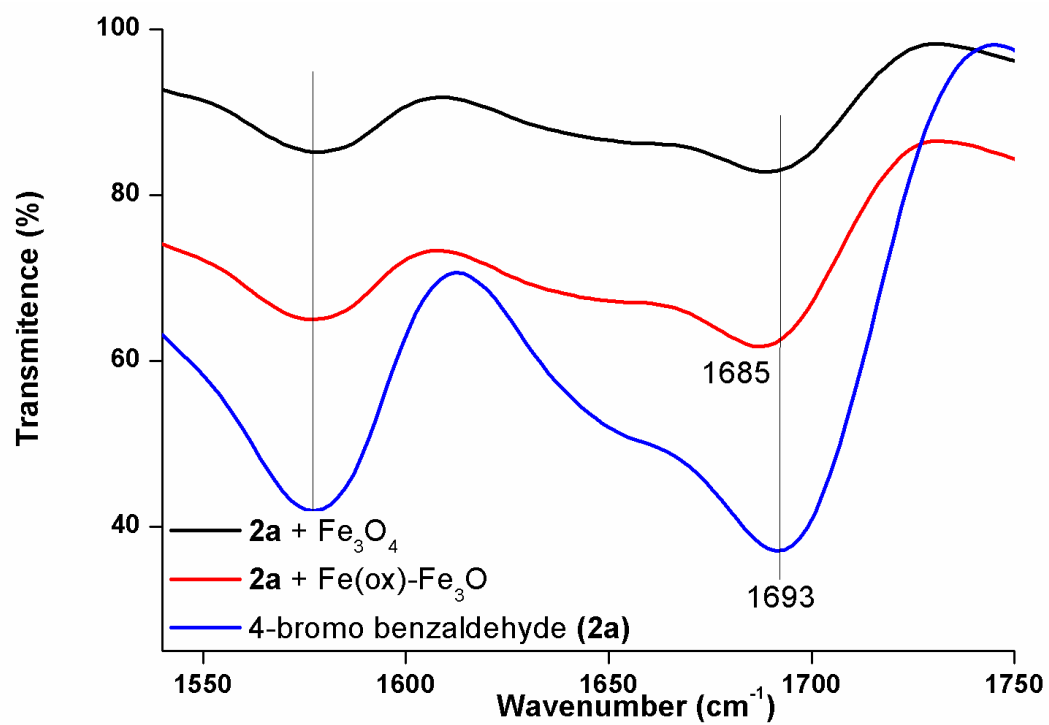

**Fig. S8.** FTIR spectra of 4-bromo benzaldehyde (C-O stretching band) on  $\text{Fe}_3\text{O}_4$  and Fe(ox)- $\text{Fe}_3\text{O}_4$ .

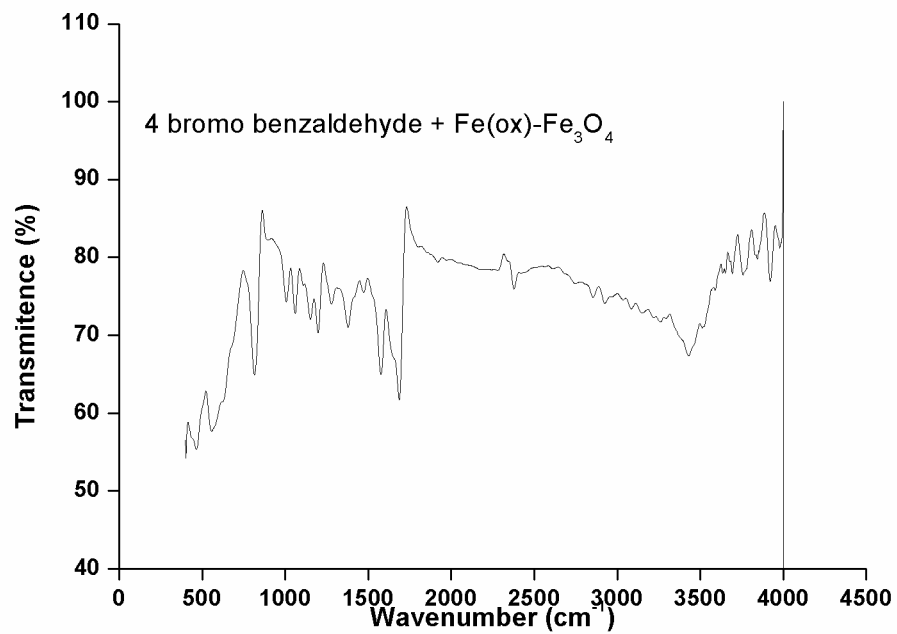

Fig. S9. FTIR spectra of 4-bromo benzaldehyde on  $\text{Fe(ox)-Fe}_3\text{O}_4$ .

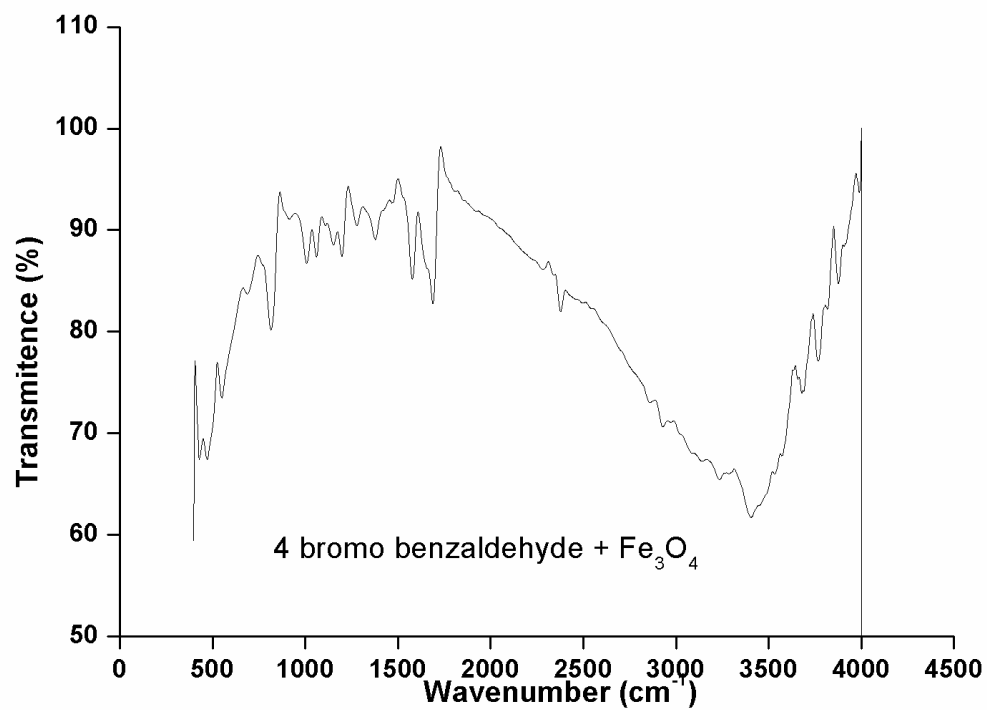

Fig. S10. FTIR spectra of 4-bromo benzaldehyde on  $\text{Fe}_3\text{O}_4$ .

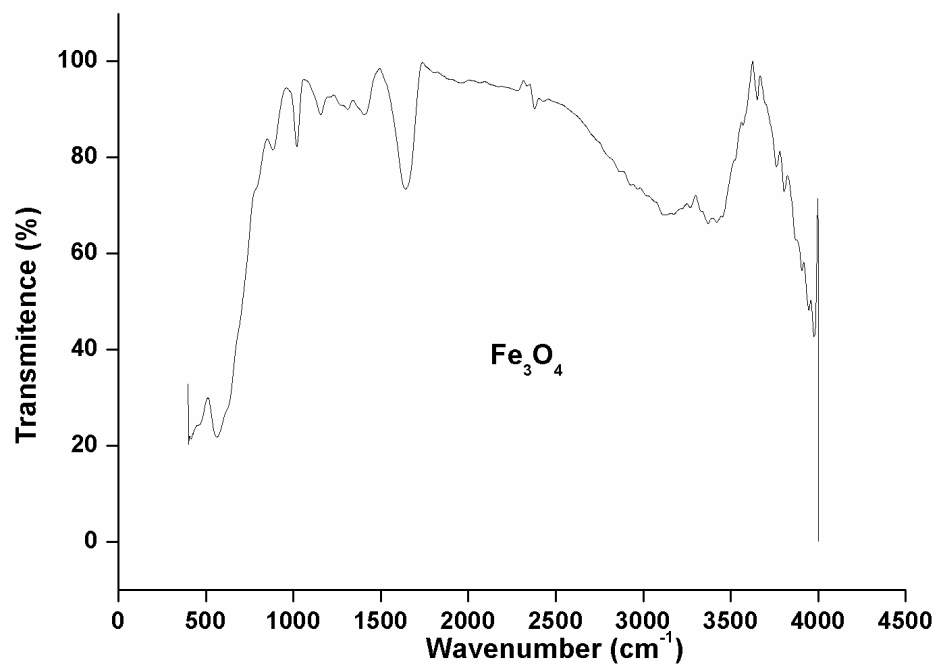

Fig S11. FTIR spectra of  $\text{Fe}_3\text{O}_4$ .

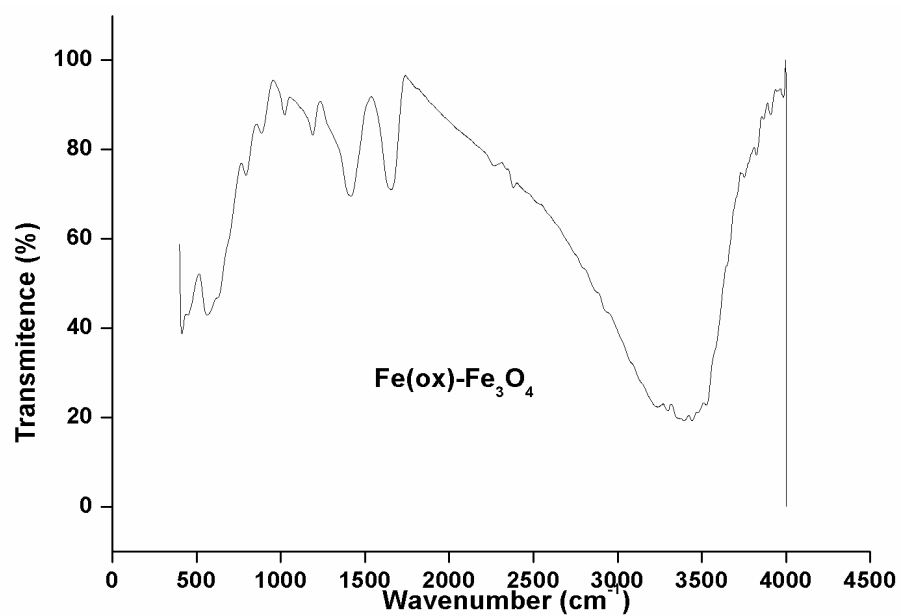

Fig S12. FTIR spectra of  $\text{Fe(ox)-Fe}_3\text{O}_4$ .

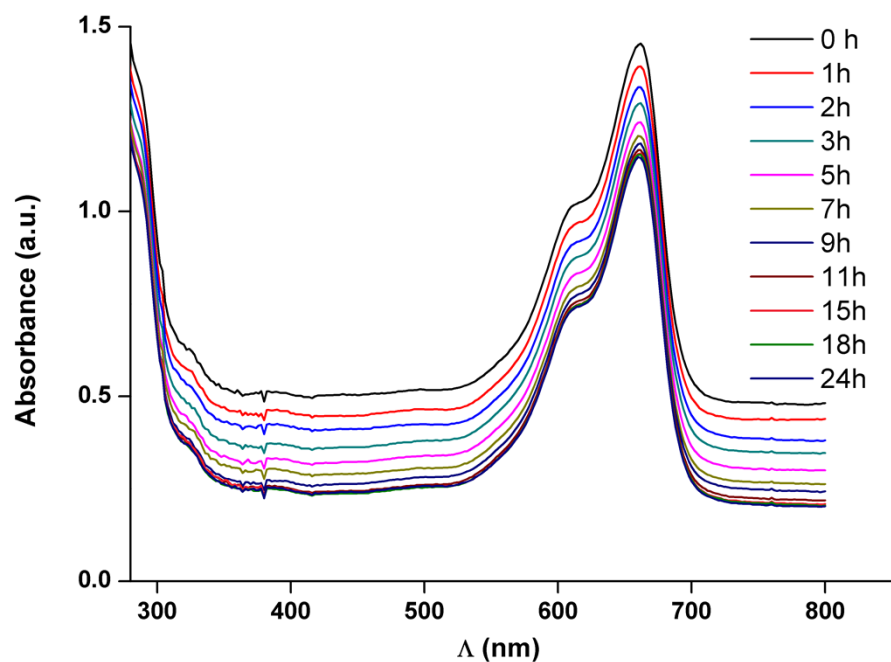

**Fig S13.** Absorbance *versus* wavelength plot of Fe(ox)-Fe<sub>3</sub>O<sub>4</sub> promoted reaction of methylene blue in dark.

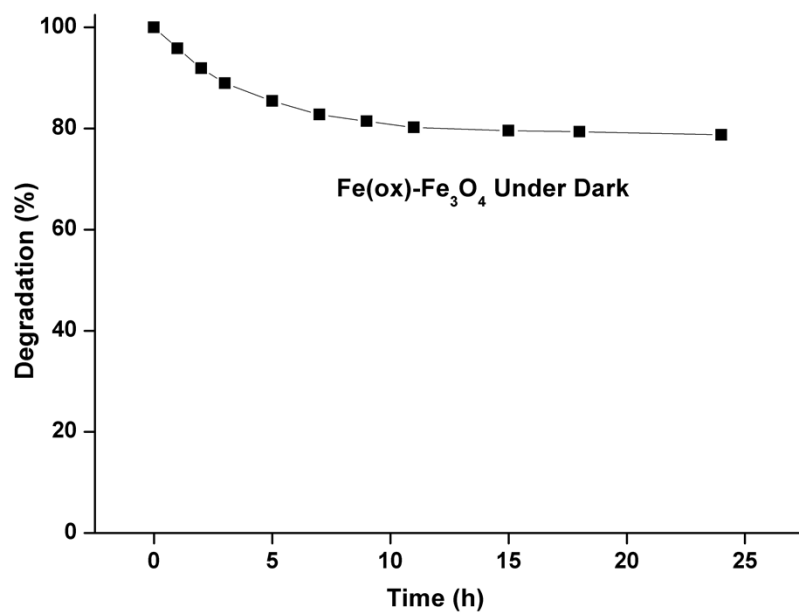

**Fig S14.** Degradation (%) *versus* time plot of Fe(ox)-Fe<sub>3</sub>O<sub>4</sub> promoted reaction of methylene blue in dark.

Fig S15.  $^1\text{H}$  and  $^{13}\text{C}$  NMR spectrum of compound **1a** in acetone- $\text{d}_6$

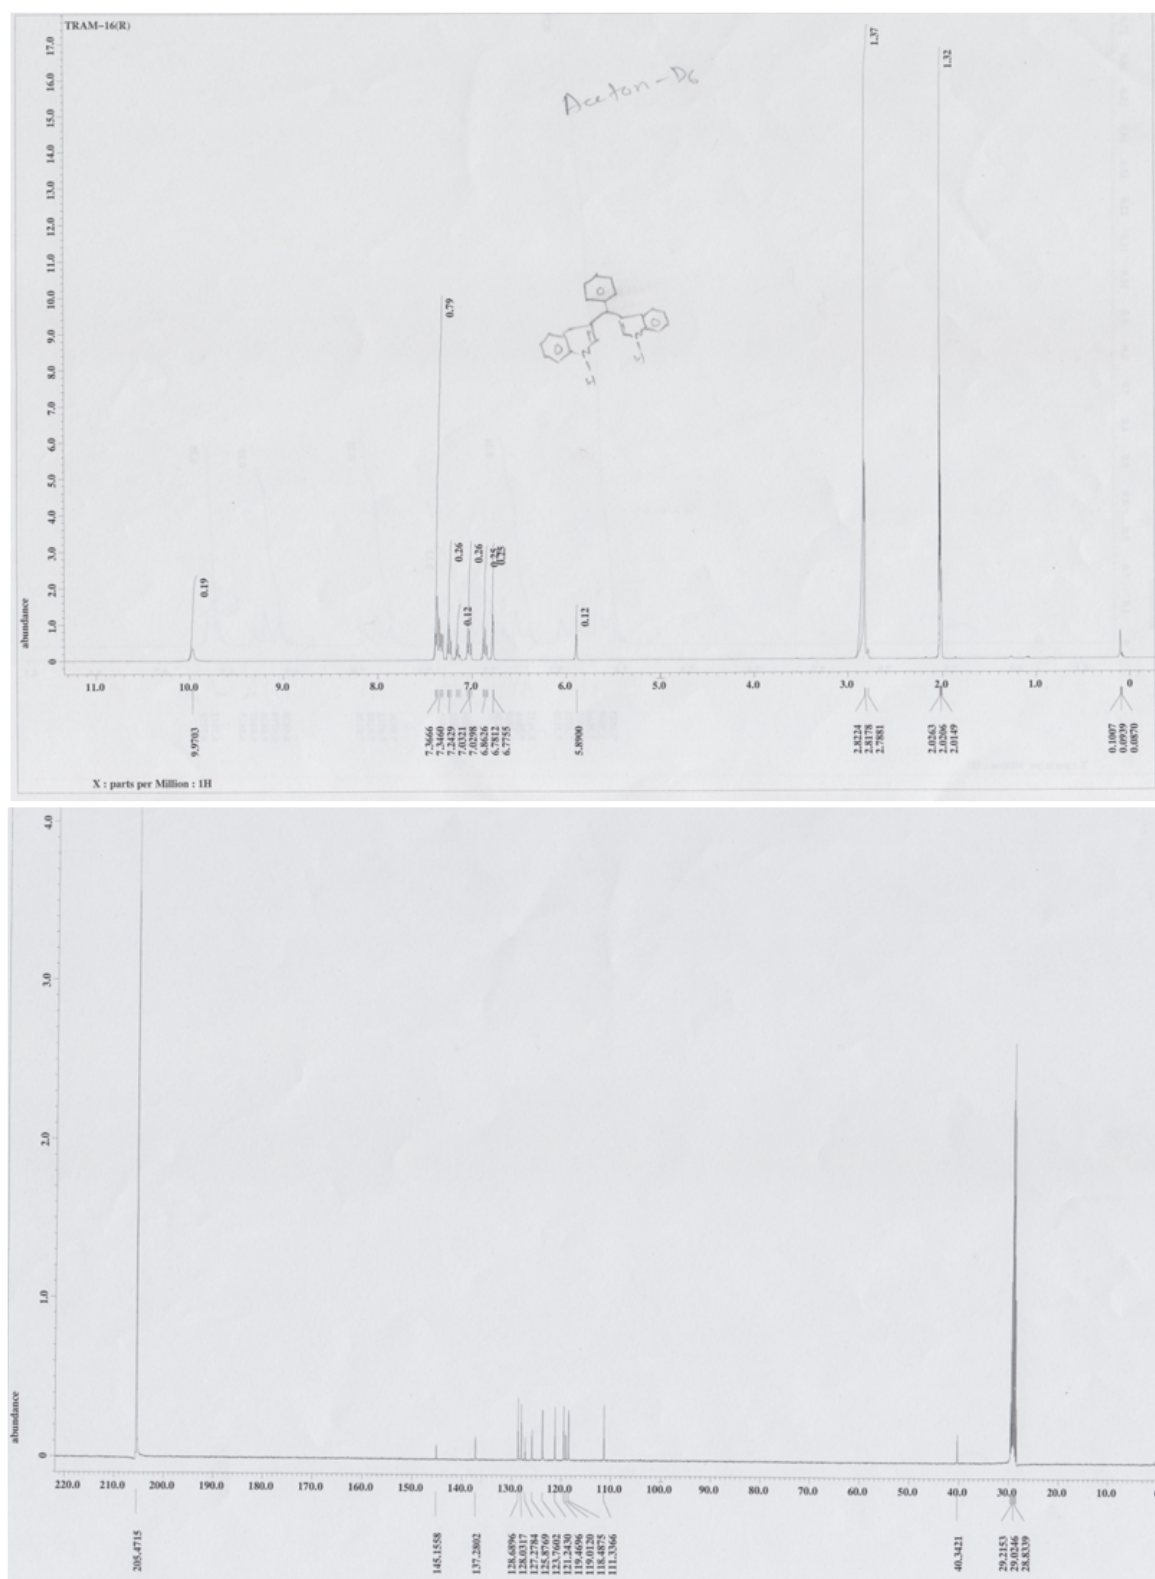

Fig S16.  $^1\text{H}$  and  $^{13}\text{C}$  NMR spectrum of compound **1b** in acetone- $\text{d}_6$

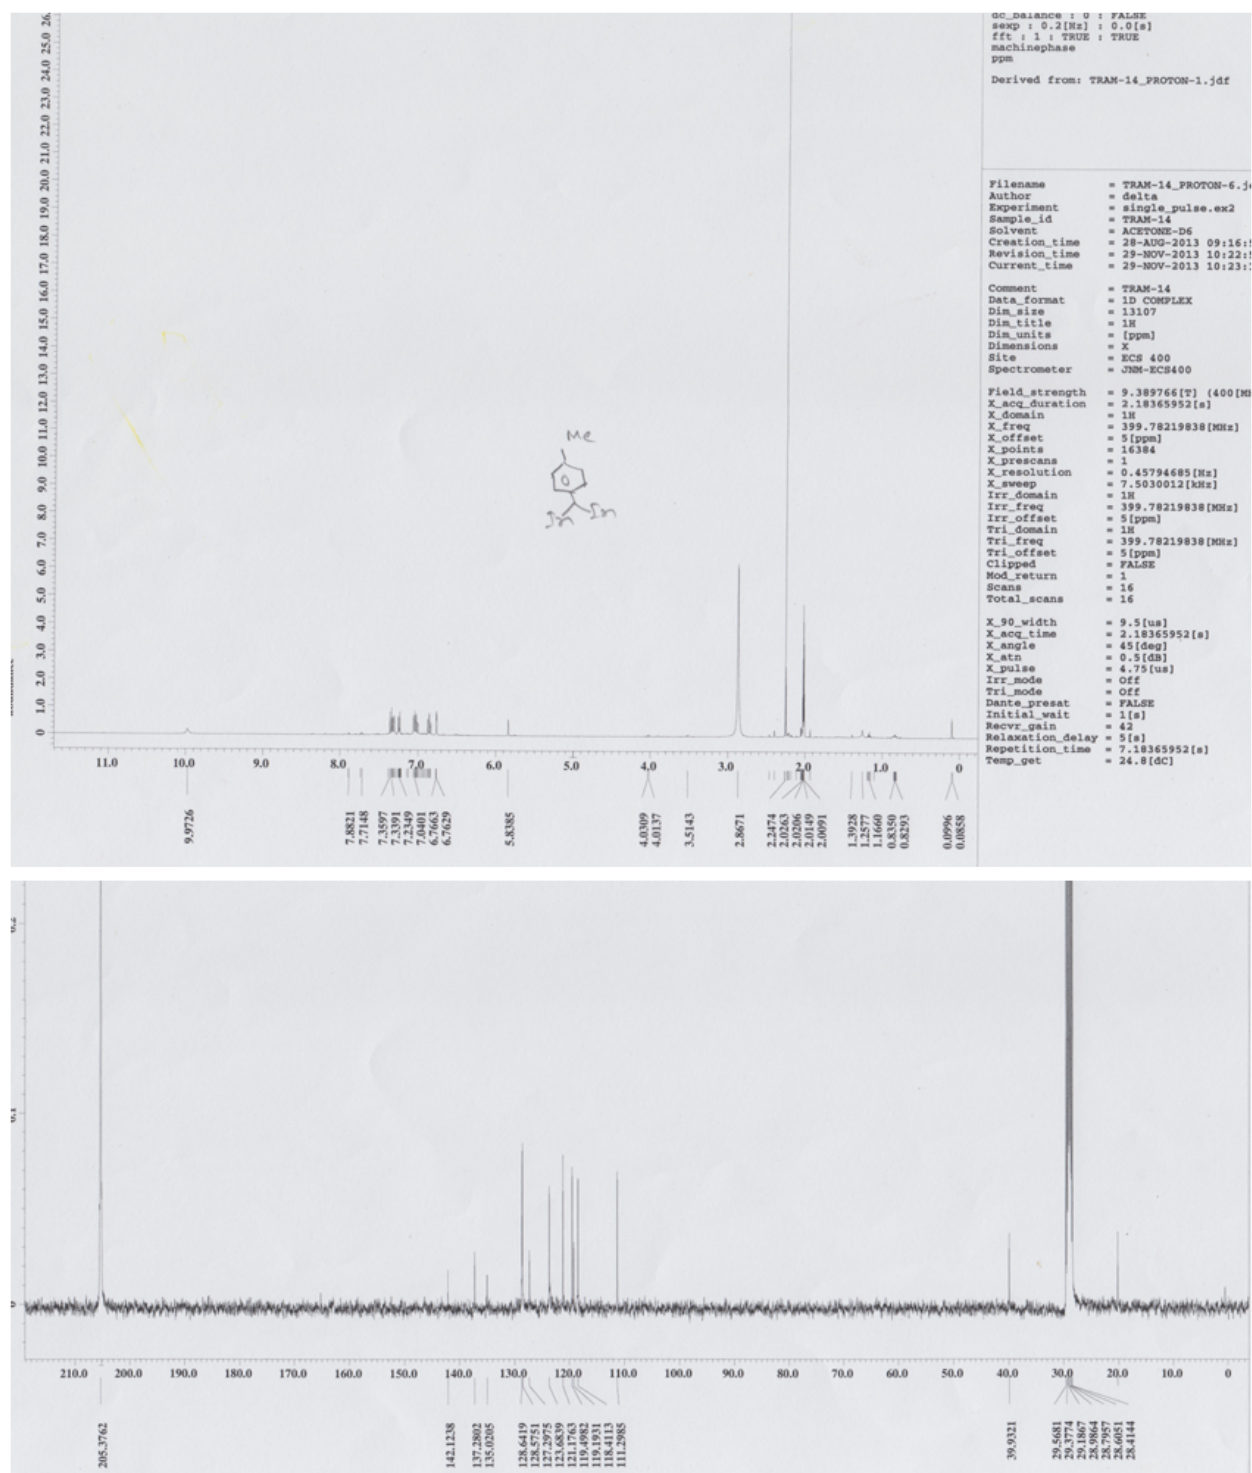

Fig S17.  $^1\text{H}$  and  $^{13}\text{C}$  NMR spectrum of compound **1c** in DMSO- $\text{d}_6$

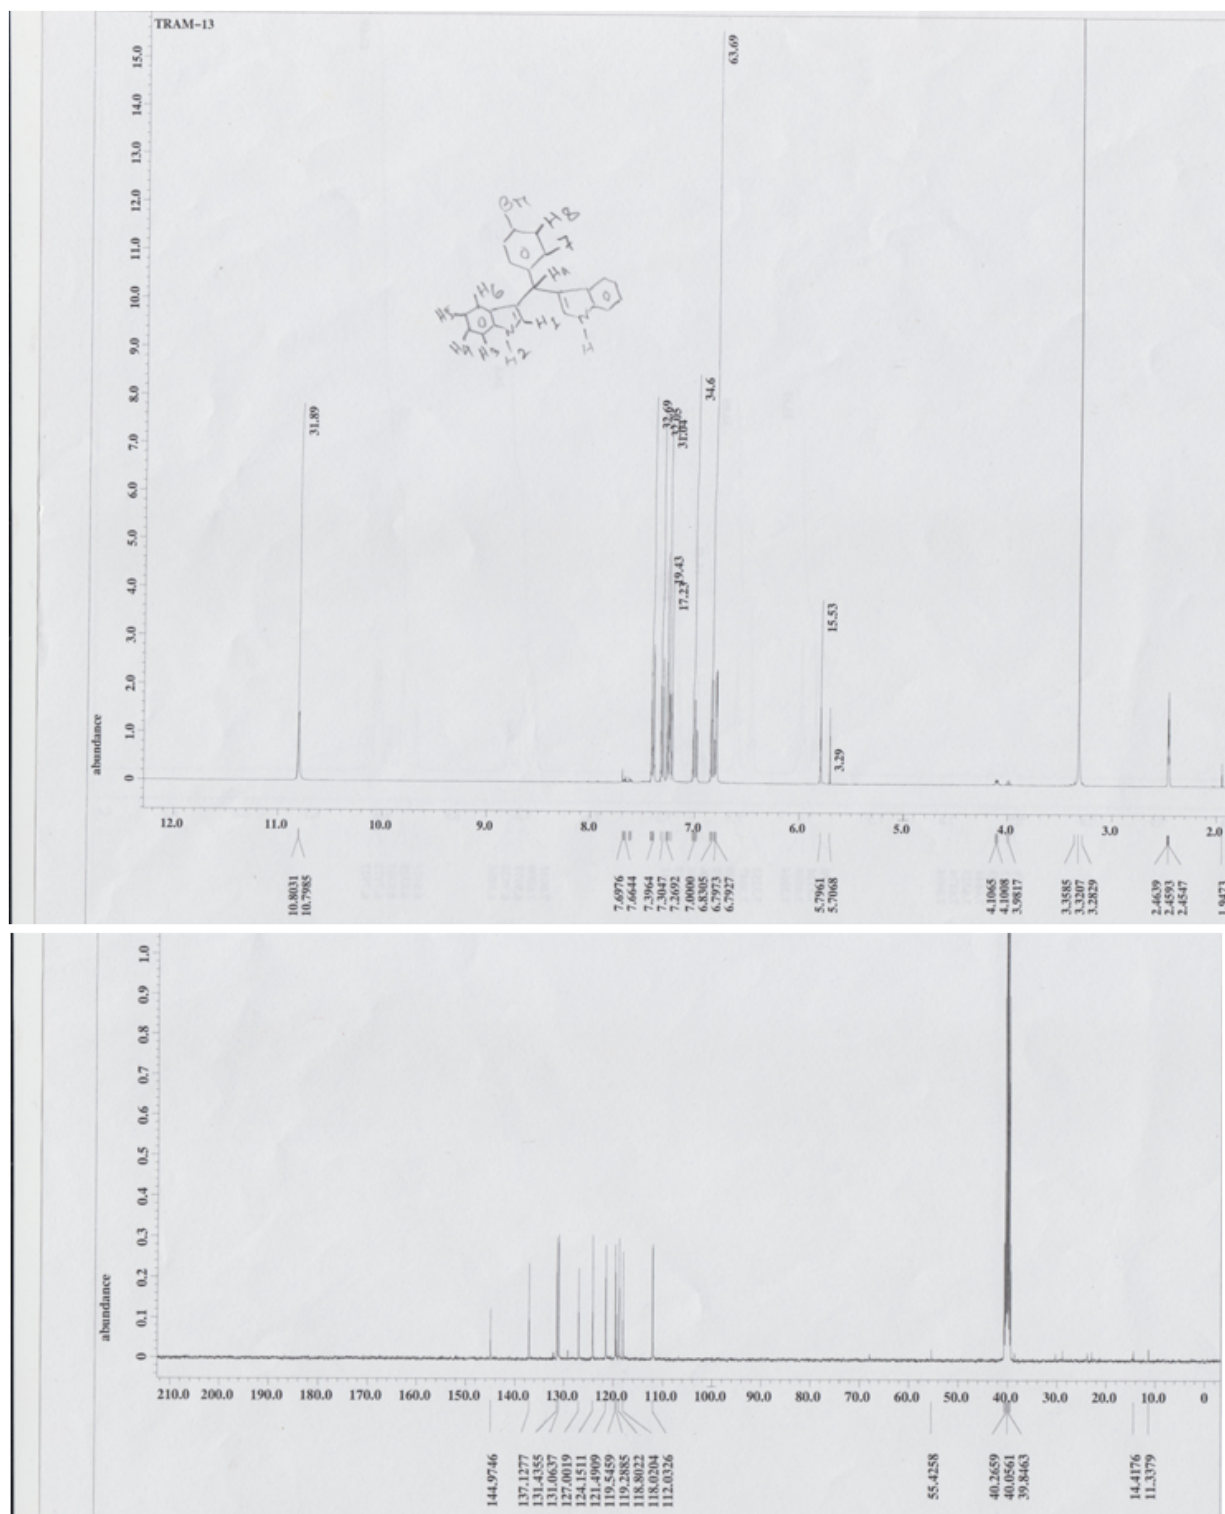



Fig S18.  $^1\text{H}$  and  $^{13}\text{C}$  NMR spectrum of compound **1d** in Acetone- $\text{d}_6$

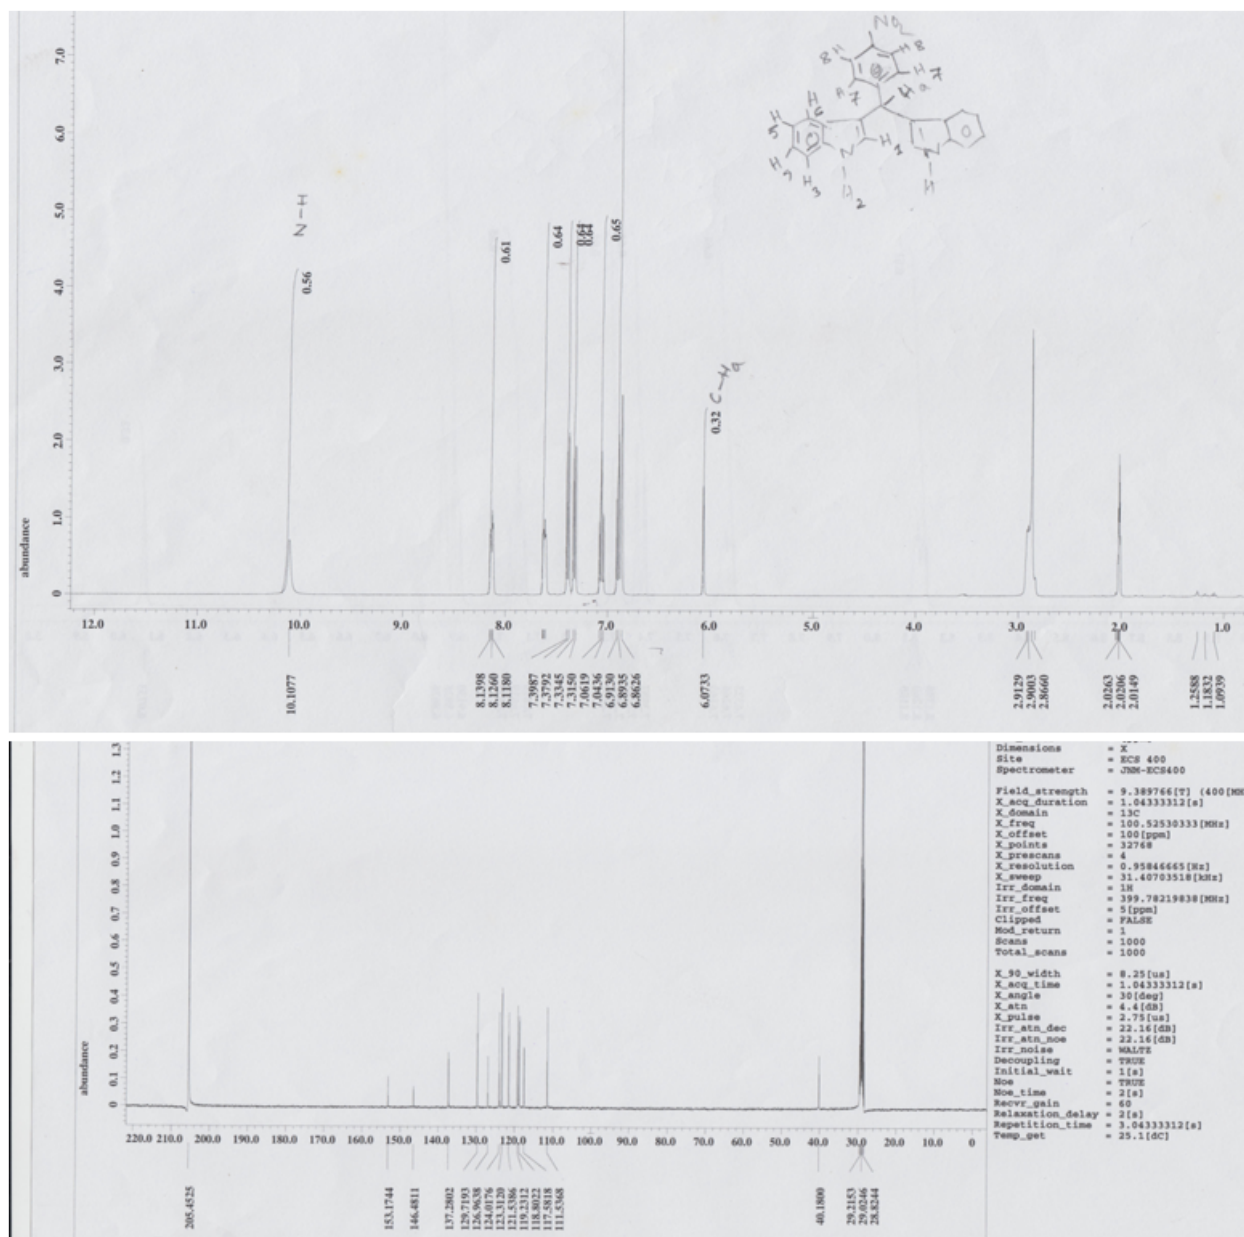



Fig S19.  $^1\text{H}$  and  $^{13}\text{C}$  NMR spectrum of compound **1e** in Acetone- $\text{d}_6$

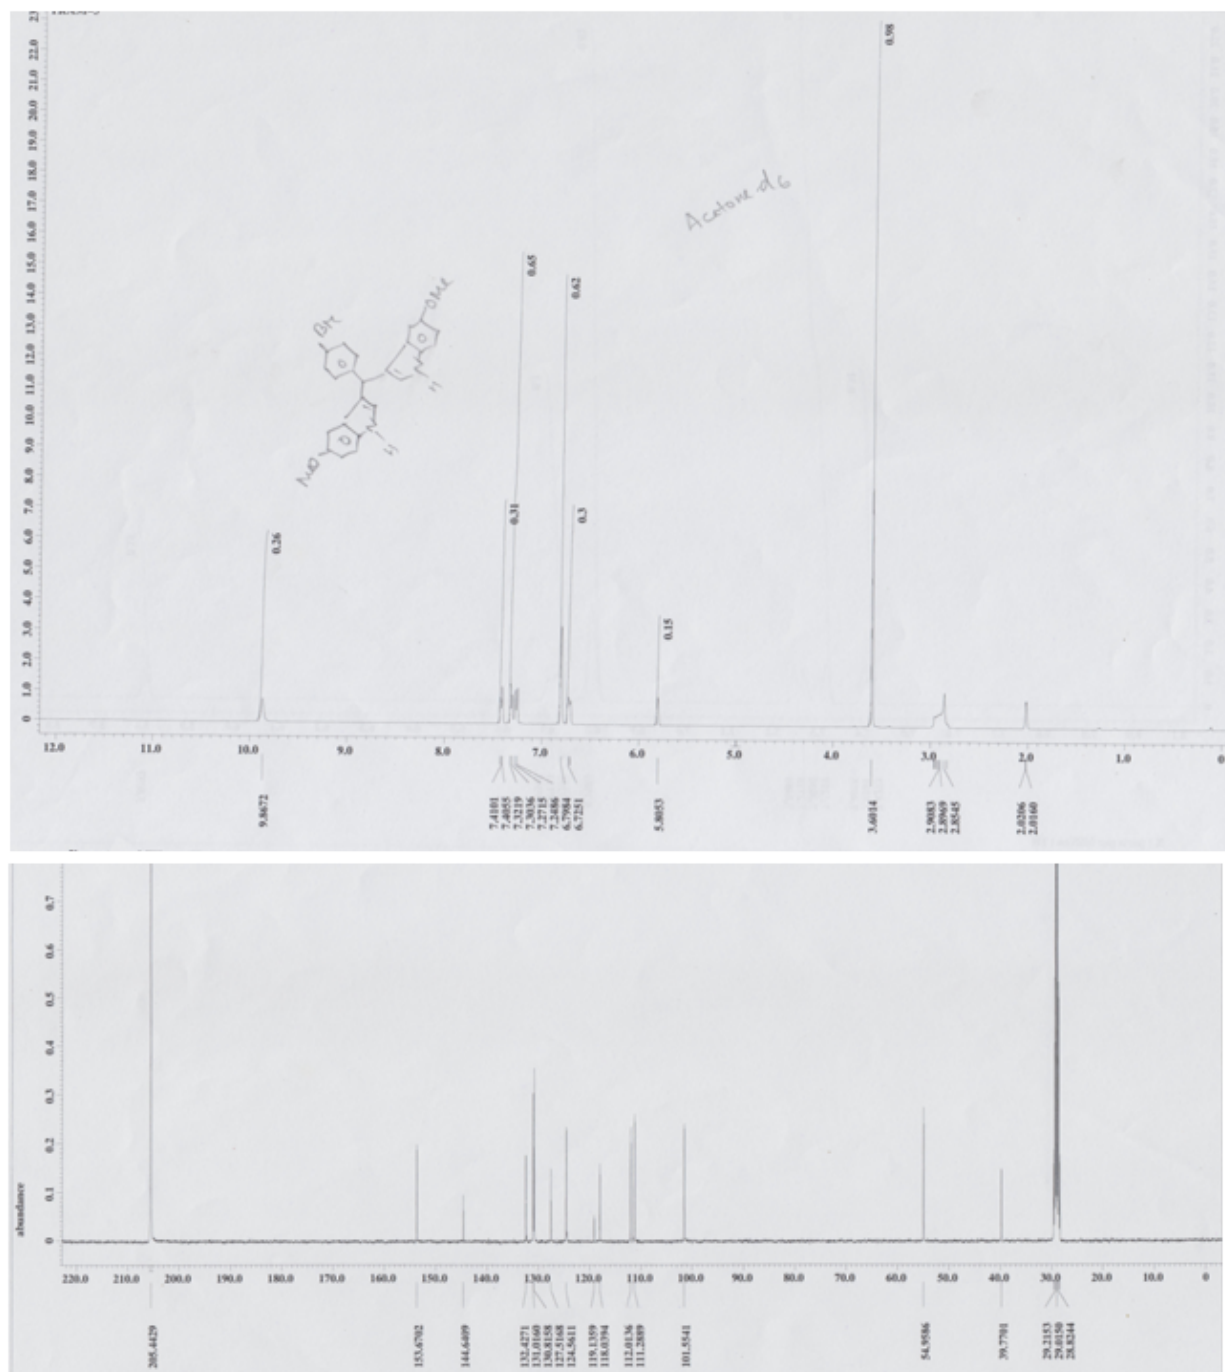

Fig S20.  $^1\text{H}$  and  $^{13}\text{C}$  NMR spectrum of compound **1f** in Acetone- $\text{d}_6$

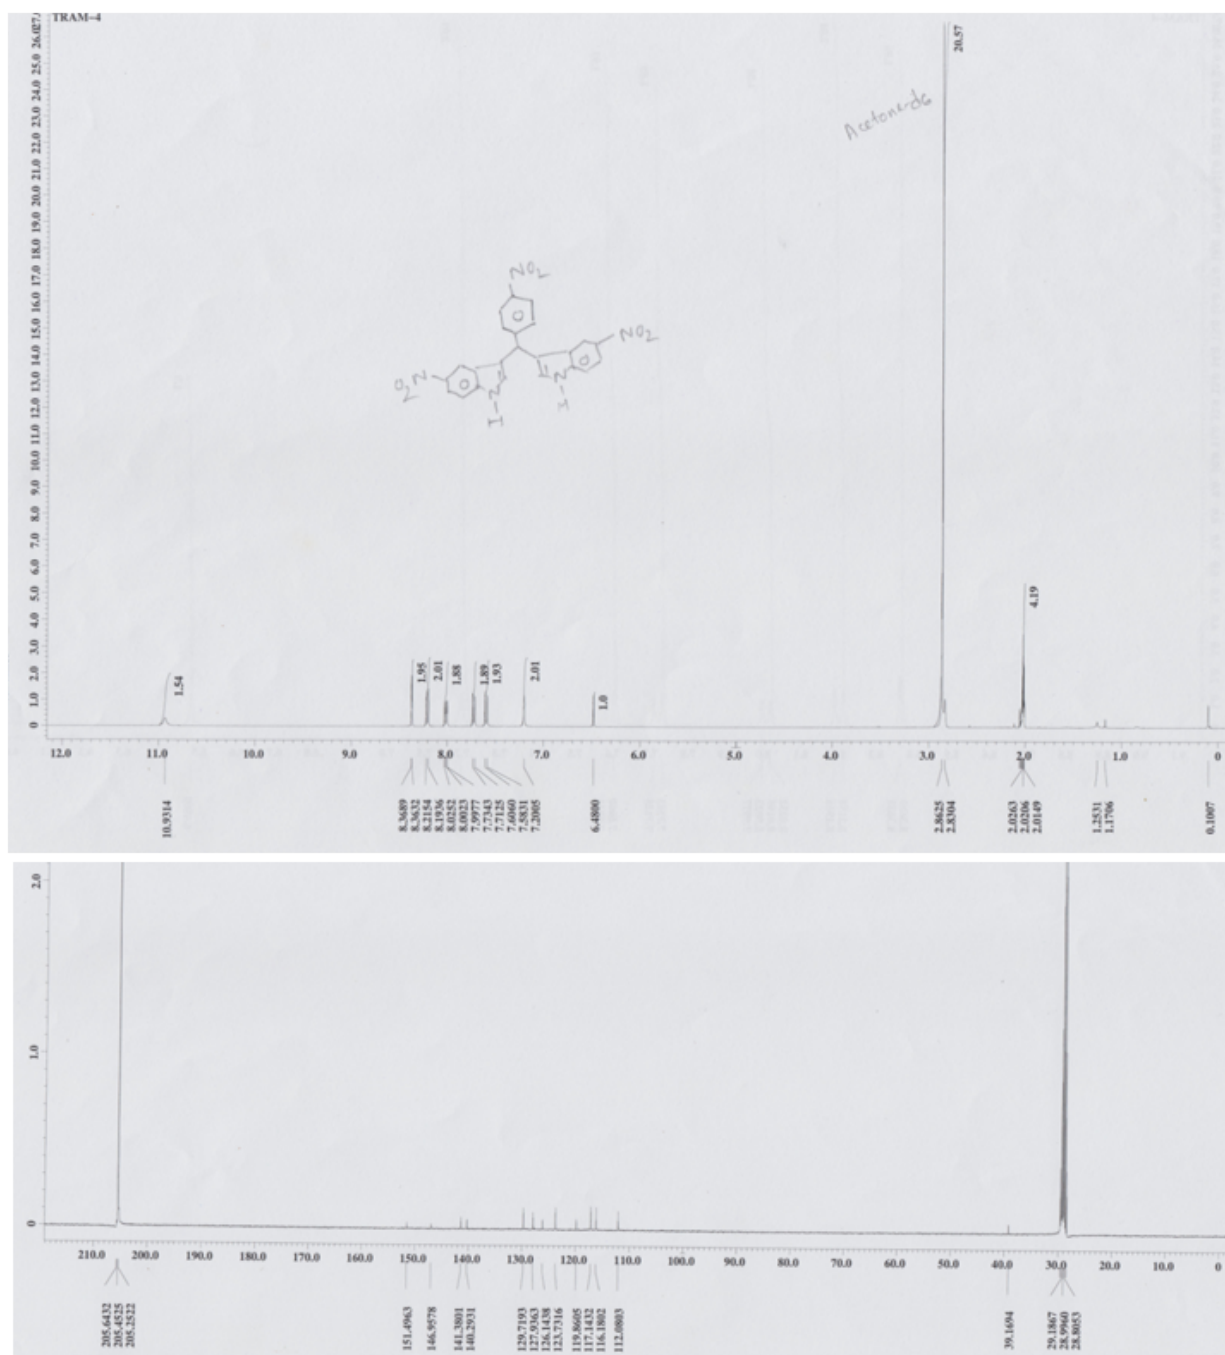

Fig S21.  $^1\text{H}$  and  $^{13}\text{C}$  NMR spectrum of compound **1g** in Acetone- $\text{d}_6$

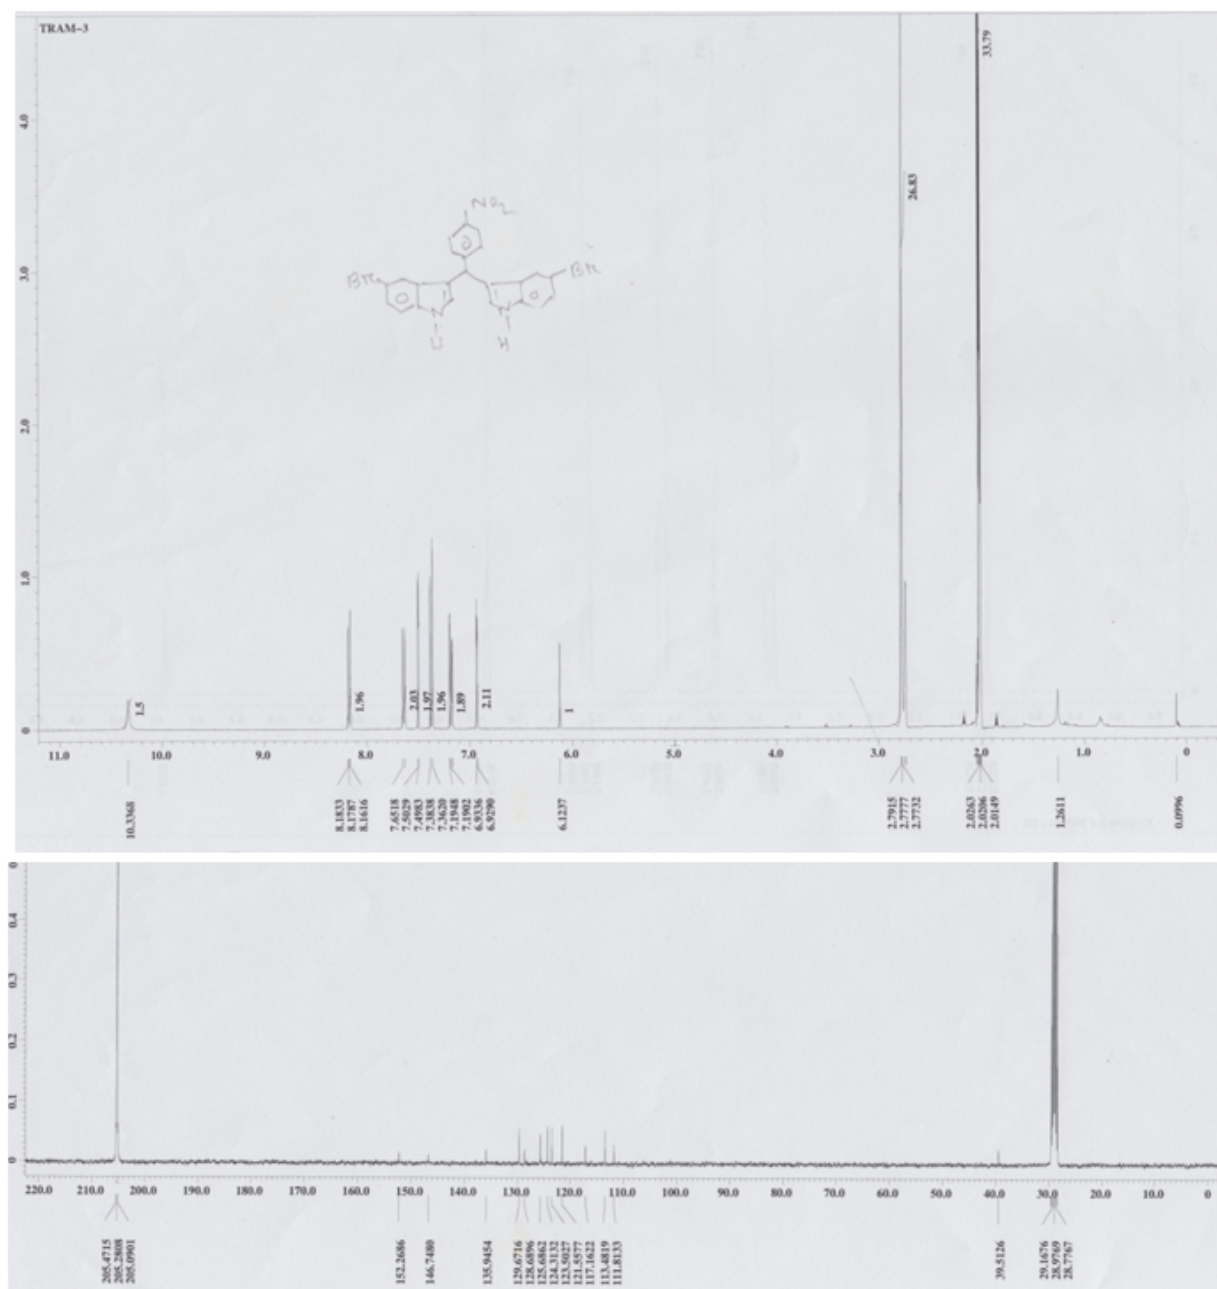

Fig S22.  $^1\text{H}$  and  $^{13}\text{C}$  NMR spectrum of compound **1h** in Acetone- $\text{d}_6$

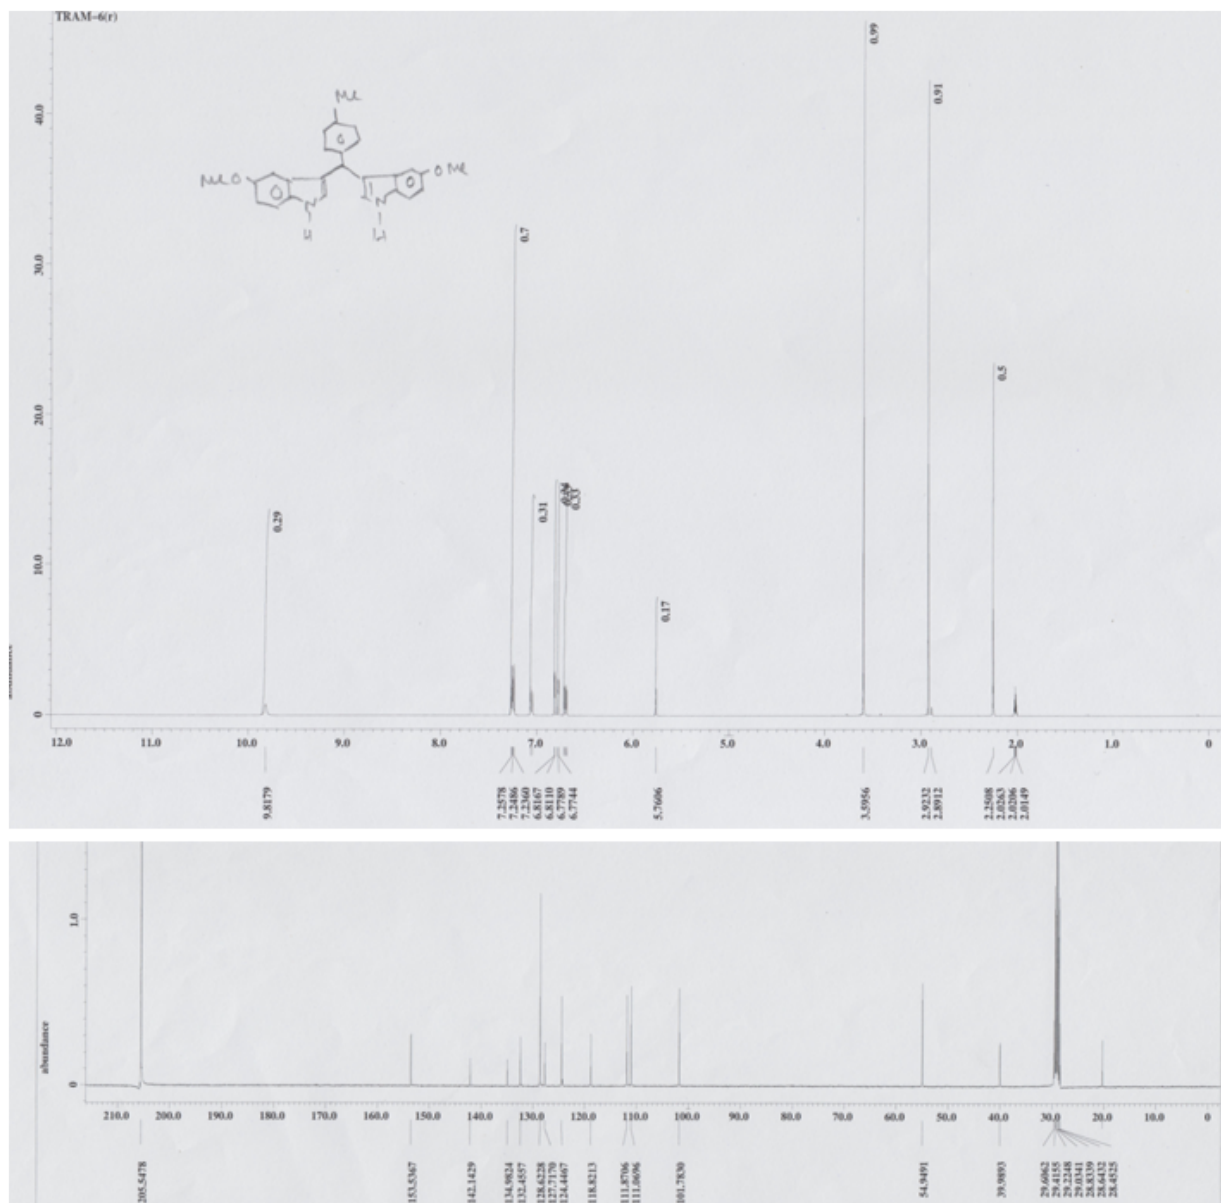

Fig S23.  $^1\text{H}$  and  $^{13}\text{C}$  NMR spectrum of compound **1i** in Acetone- $\text{d}_6$

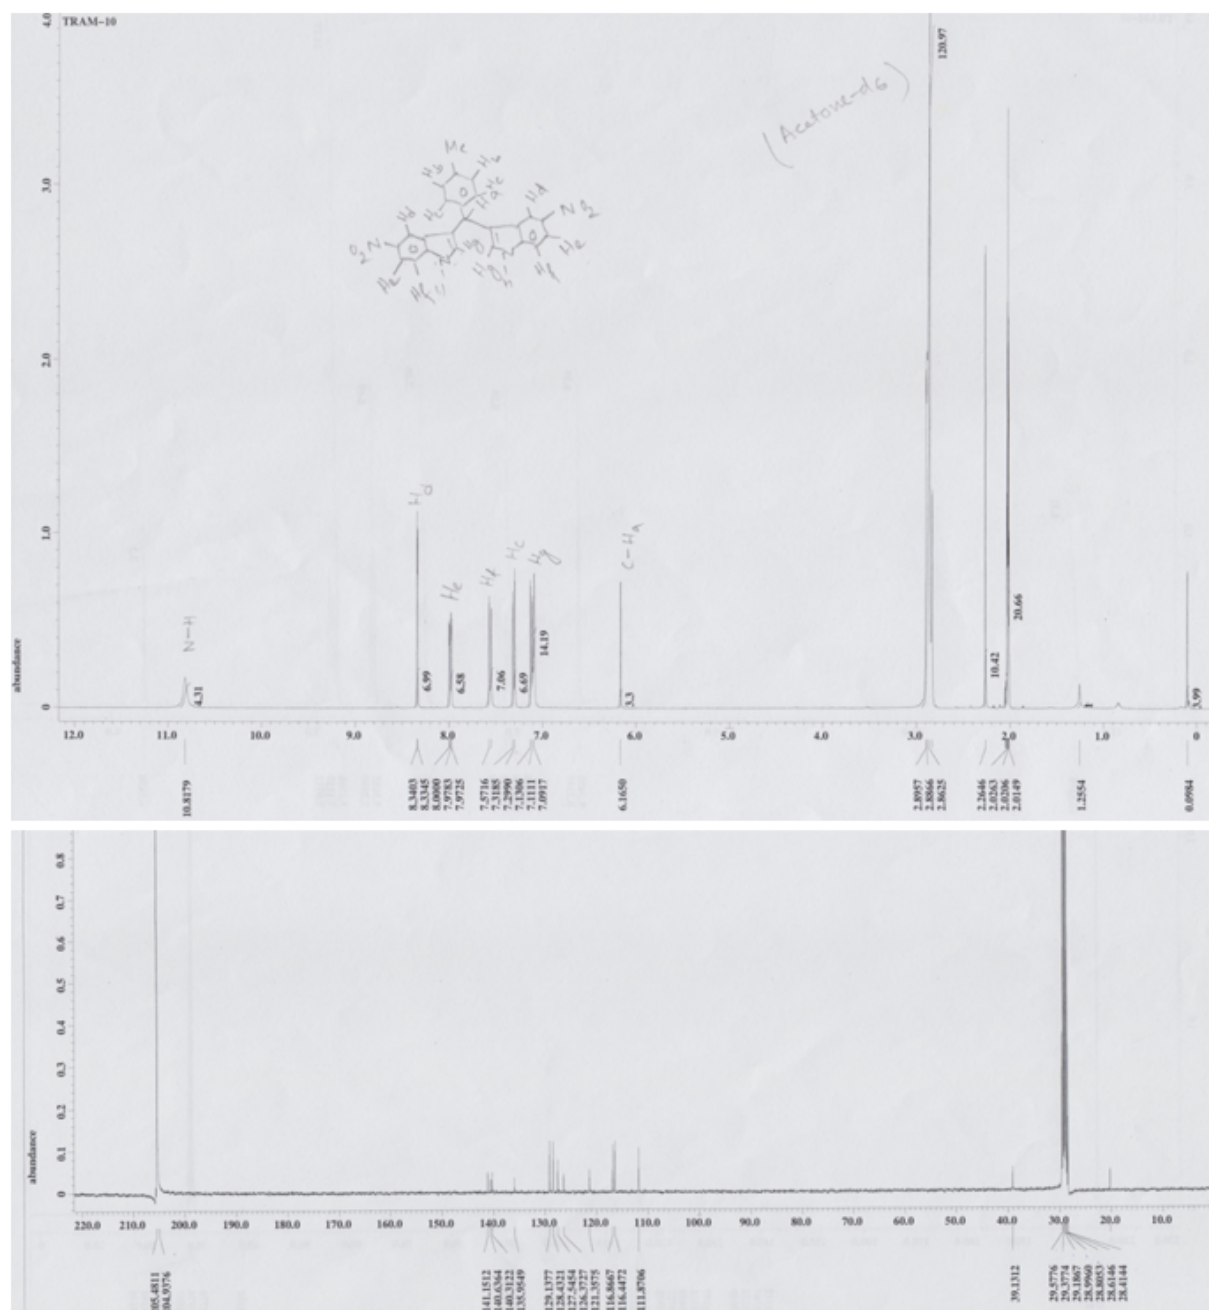



Fig S24.  $^1\text{H}$  and  $^{13}\text{C}$  NMR spectrum of compound **1j** in Acetone- $\text{d}_6$

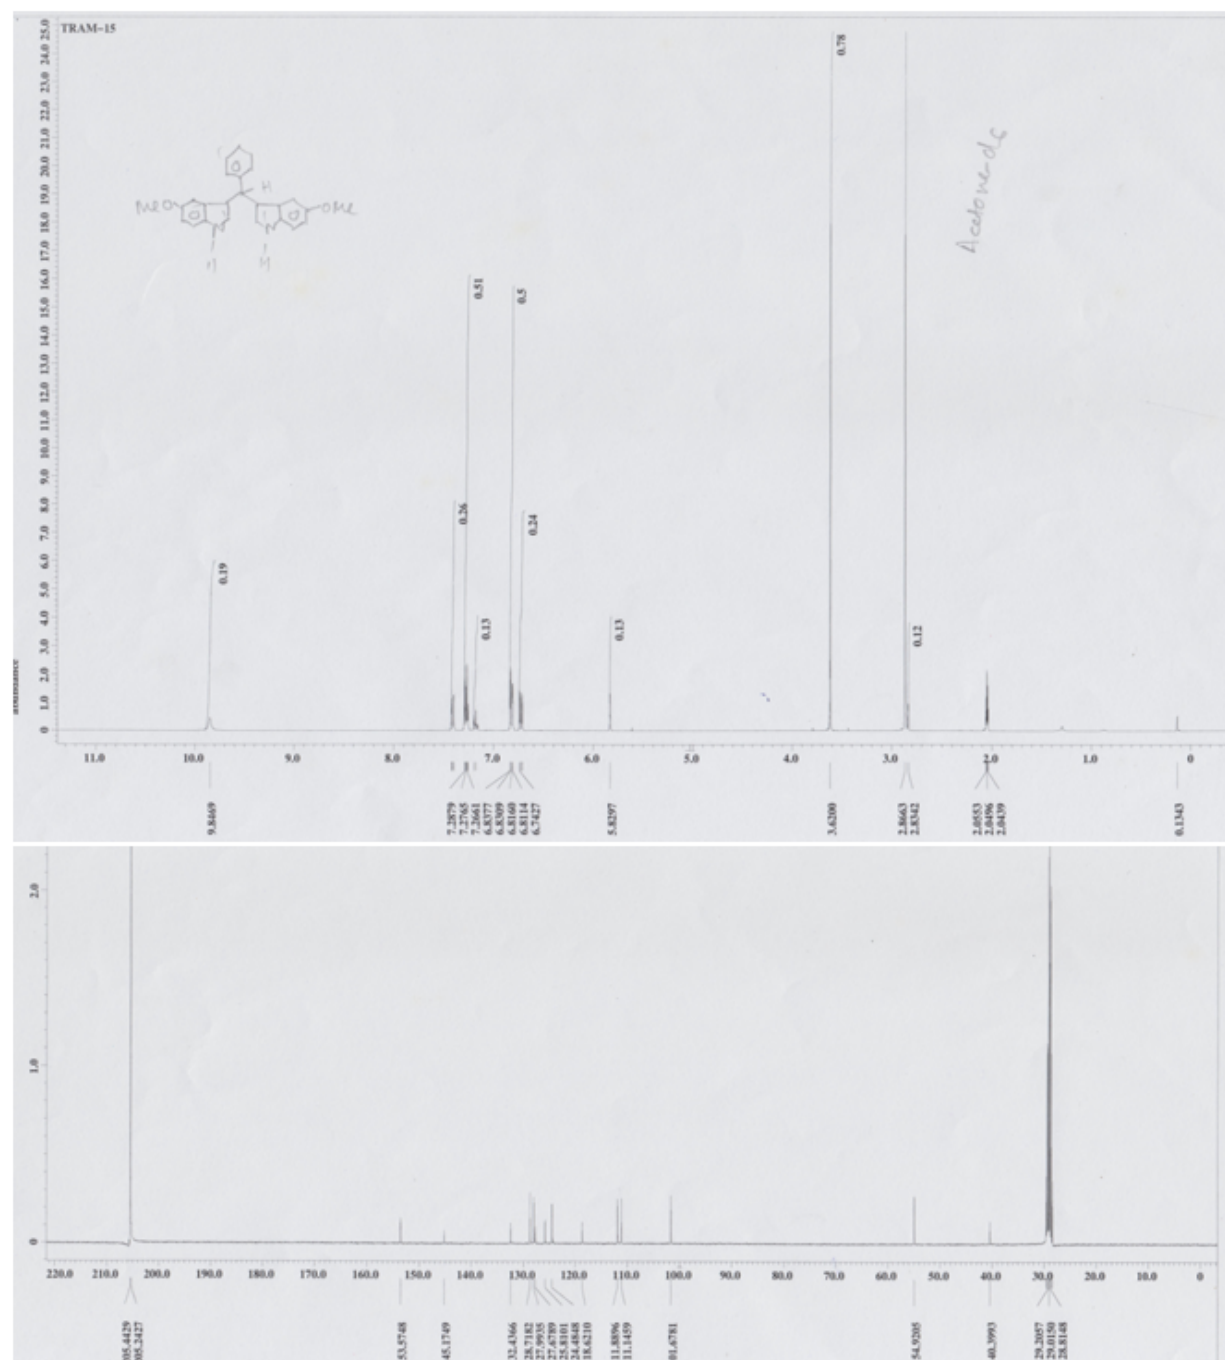

## References:

- <sup>1</sup> (a) T. J. LuPage and Kenneth B. Wiberg, *J. Am. Chem. Soc.*, 1988, **110**, 6643. (b) R. Gaba, M. Bhandari and R. Kakkar, *Adv. Mat. Lett.* 2013, **4**, 769. (c) J. Álvarez-Rodríguez, M. Cerro-Aarçon, A. Guerrero-Ruiz, I. Rodríguez-Ramos and A. Arcoya, *Appl. Catal., A*, 2008, **348**, 241. (d) A. Stolle, T. Gallert, C. Schmöger and B. Ondruschka, *RSC Adv.*, 2013, **3**, 2112 and references therein.
